# Supplementary material
Source: PubMed Central journal article supplement (PMC4350140)
Supplement: Supp_Fig1.pdf [file Supp_Fig1.pdf]

## Supplementary Data

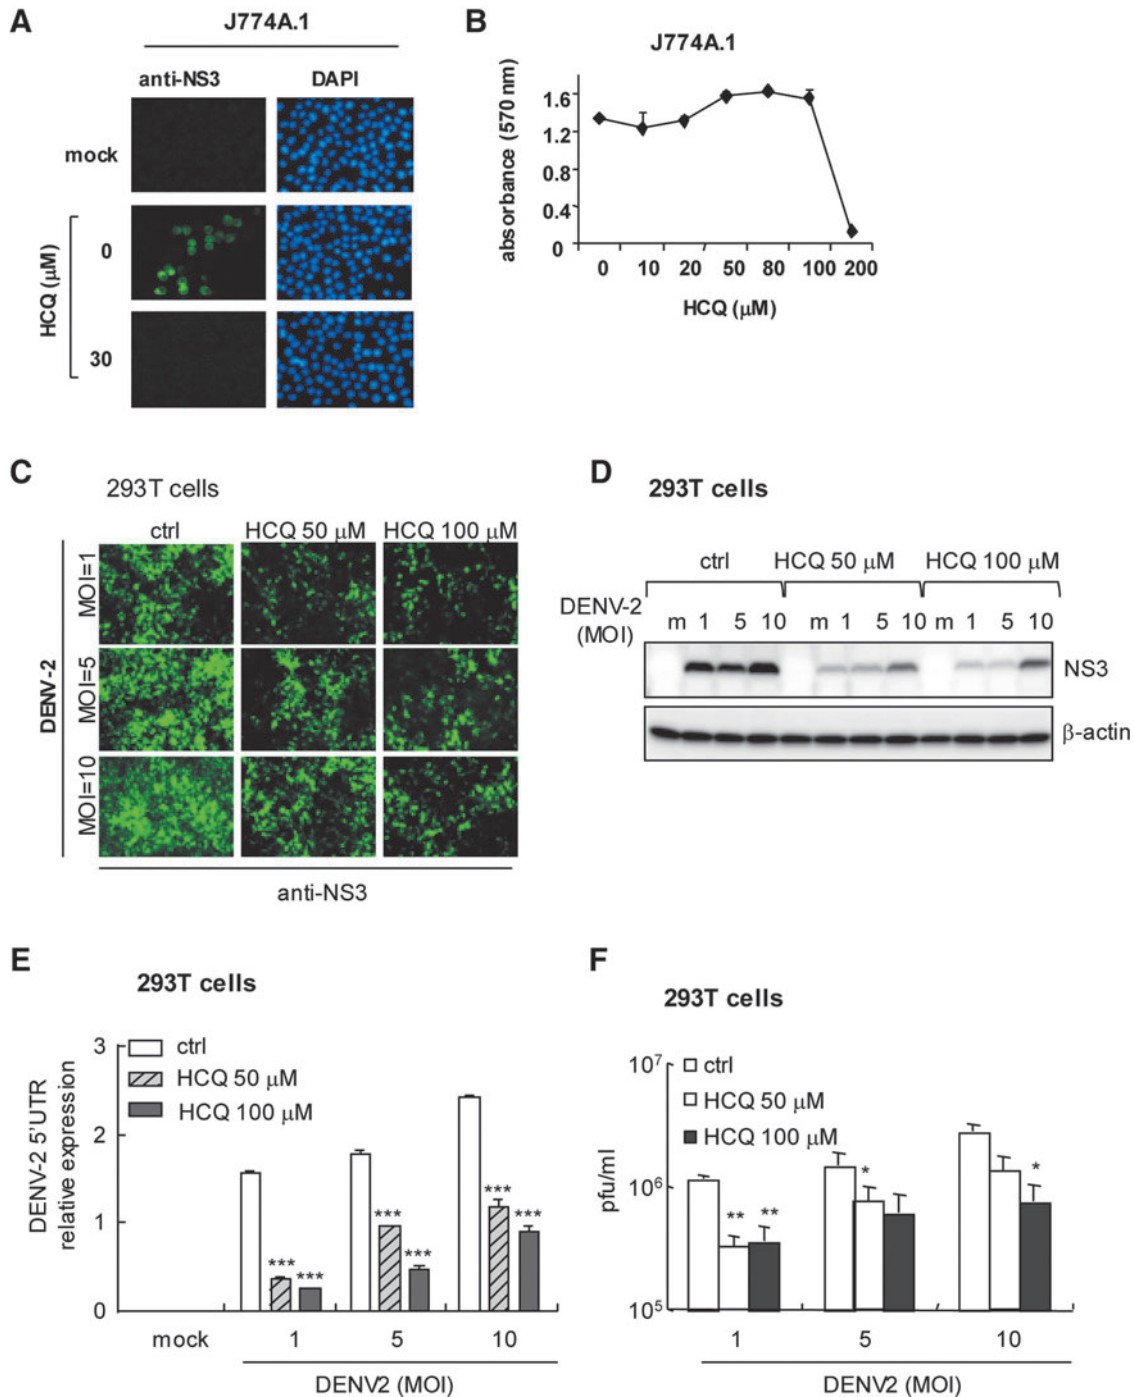

**SUPPLEMENTARY FIG. S1.** Hydroxychloroquine (HCQ) inhibits DENV-2 infection in J774A.1 macrophages and HEK-293T cells. (A) J774A.1 mouse macrophages were pretreated with 30 μM HCQ for 24 h before DENV-2 inoculation. DENV-2 infection was monitored by immunofluorescence assay (IFA) with anti-DENV-2 NS3 antibody (*left panels*), and cell nuclei were counterstained with DAPI (*right panels*). (B) MTT assay of viability of J774A.1 cells at 24 h after HCQ treatment. Data are mean ± SD from 3 experiments. (C) HCQ (50 and 100 μM)-pretreated HEK-293T cells were infected with DENV-2 at multiplicity of infection (MOI) 1, 5 and 10. DENV-2 infection was determined by IFA with anti-DENV-2 NS3 antibody, immunoblot analysis of NS3 protein level (D), RT-qPCR of viral 5'UTR (untranslation region) gene replication (E), and plaque-forming assay of viral titration (F). Data are mean ± SD from 3 independent experiments. \* $P \leq 0.05$ ; \*\* $P \leq 0.01$ ; \*\*\* $P \leq 0.005$  versus untreated group.
