# Supplementary material
Source: PubMed Central journal article supplement (PMC4350140)
Supplement: Supp_Fig2.pdf [file Supp_Fig2.pdf]

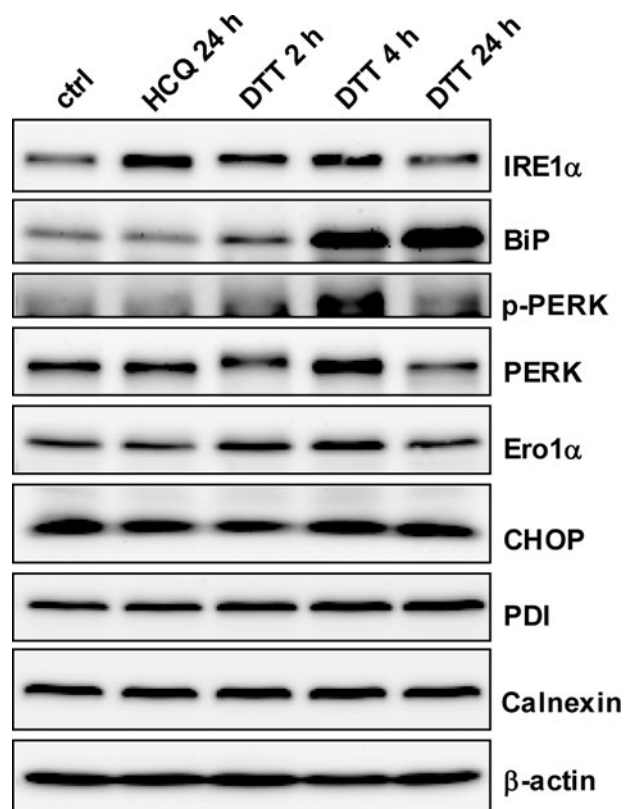

**SUPPLEMENTARY FIG. S2.** HCQ increases the expression of inositol-requiring protein 1 $\alpha$  (IRE1 $\alpha$ ) of the endoplasmic reticulum (ER) stress pathway. Western blot analysis of proteins in the ER-stress pathway in A549 cells ( $2 \times 10^5$ ) treated with HCQ (50  $\mu$ M) for 24 h. Cells stimulated with dithiothreitol (DTT) at 2, 4 and 24 h were a positive control.
