# Supplementary material
Source: PubMed Central journal article supplement (PMC4350140)
Supplement: Supp_Fig3.pdf [file Supp_Fig3.pdf]

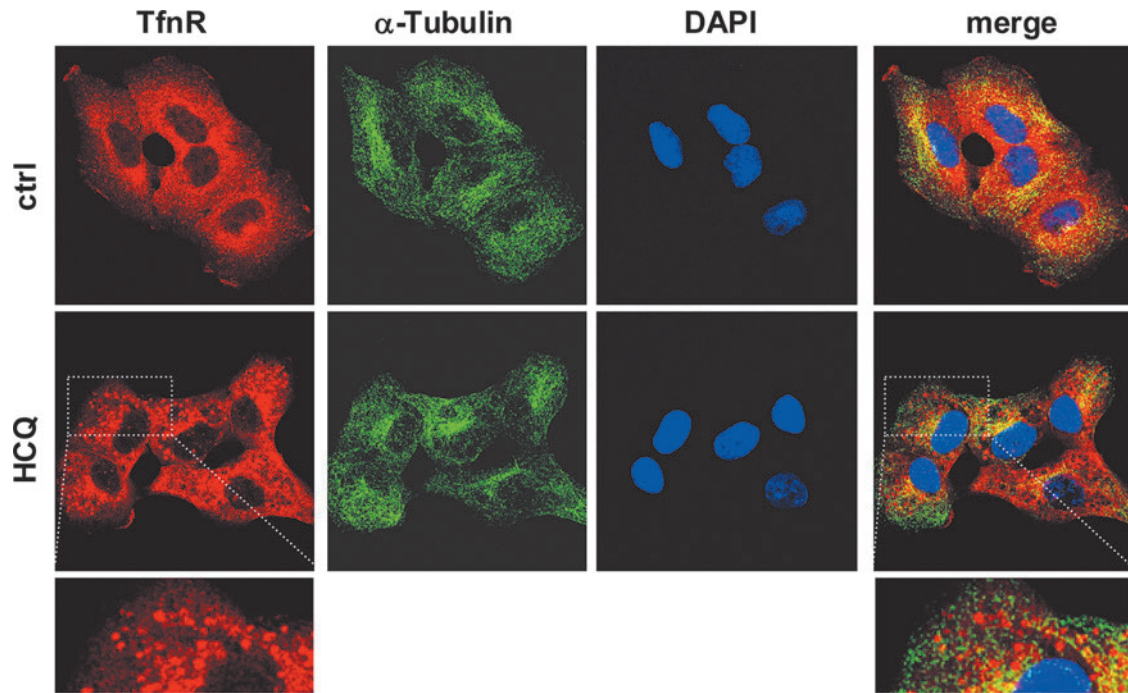

**SUPPLEMENTARY FIG. S3.** HCQ alters the distribution of cellular transferrin receptor (TfnR). IFA of HCQ (50  $\mu$ M)-treated A549 cells for 24 h. Cells were incubated with primary antibody against TfnR and  $\beta$ -tubulin, then Alexa Fluoro 568 (*red color*)- and Alexa Fluoro 488 (*green color*)-conjugated secondary antibodies. DAPI signaling (*blue color*) indicates the cell nucleus. Images were captured by confocal microscopy and merged. The zoom-in punctate structure of TfnR is shown in the *lower panels*.
