# Supplementary material
Source: PubMed Central journal article supplement (PMC4350140)
Supplement: Supp_Table1.pdf [file Supp_Table1.pdf]

SUPPLEMENTARY TABLE S1. PRIMERS USED  
FOR HUMAN GENE AND DENV-2 (5' UTR) DETECTION

| <i>Human gene</i> | <i>Primer sequence</i>                                      |
|-------------------|-------------------------------------------------------------|
| IFIT3             | F'-GCTGAAGGAGAGCAGTTTGTGGA<br>R'-AGGACATCTGTTTGGCAAGGA      |
| IFN- $\beta$      | F'-AGGTAGTAGGCGACACTGTTCGT<br>R'-AGAAGCACAAACAGGAGAGCAATT   |
| MDA5              | F'-TGCTGGACTACCTGACCTTTCTG<br>R'-GGCGACTGTCCTCTGAATCTG      |
| CXCL10            | F'-TGAGCCTACAGCAGAGGAACCT<br>R'-TGAATGCCACTTAGAGTCAGAAAGA   |
| Viperin           | F'-CAAGGAAGAATGTGAGCAAGAGTAGA<br>R'-TGATATGGTGACATGGCTTCACT |
| MAVS              | F'-TGGATGTTGTAGAGATTCTGCCTTA<br>R'-CGCTGAAGGGTATTGAAGAGATG  |
| TRAF3             | F'-CTGCTTCCTTGGCCGTTTAA<br>R'-CGAGAGGACCCCTGATCCA           |
| HPRT              | F'-GAACGTCTTGCTCGAGATGTGA<br>R'-GAGCACACAGAGGGCTACAATG      |
| DENV-2<br>5' UTR  | F'-AGTTGTTAGTCTACGTGGACCGA<br>R'-CGCGTTTTCAGCATATTGAAAG     |
