# Supplementary material
Source: PubMed Central journal article supplement (PMC4350140)
Supplement: Supp_Table2.pdf [file Supp_Table2.pdf]

SUPPLEMENTARY TABLE S2. PRIMERS USED  
FOR MOUSE GENE DETECTION

| <i>Mouse gene</i> | <i>Primer sequence</i>                                        |
|-------------------|---------------------------------------------------------------|
| IFIT3             | F'-TGAGGAGAAGGCAACAATGTATGA<br>R'-GCCTTGCTTTCGCCATCTAG        |
| IFN- $\beta$      | F'-GCTCCTGGAGCAGCTGAATG<br>R'-CGTCATCTCCATAGGGATCTTGA         |
| IRF3              | F'-CACCCCAAGAAAATCCACTGA<br>R'-AGGCGGTCACCTCGAACTC            |
| IRF7              | F'-CAGCCTTGGGTTCCTGGAT<br>R'-CCCACCACTGCCTGTAGCA              |
| MAVS              | F'-GACTTTCCTGCTGCGGTTTC<br>R'-GTAAGCCATGGTCAGGGATGTT          |
| MDA5              | F'-GCAACAAGTACTCAACCACTAAACCA<br>R'-AGGAGATGAACT GACTGTGGAAAT |
| MVP               | F'-AAGAACC GGAATGATCCTGAAG<br>R'-GGCGTCGCCACAAAAGT            |
| RIG-1             | F'-GCGGCGCCGAATAGTTT<br>R'-GTT TAACCCCTCCCCACCAT              |
| TRAF3             | F'-GCCCCGTCTCCCTTTTAGTG<br>R'-GGCCACCTCGCATAGGAA              |
| TRAF6             | F'-CCCAGTTGCACATGAGACTGTT<br>R'-CGGACGCAAAGCAAGGTTAA          |
| UXT-V1            | F'-AGAGAACTACAAGGCCTGCAGAA<br>R'-TGGGAAGATGCAGTCAATGG         |
| Viperin           | F'-GGCGTGGAAGAAGCAATAAAGT<br>R'-CGCCACGCTTCAGAAACA            |
| HPRT              | F'-GCTCGAGATGTCATGAAGGAGAT<br>R'-AAAGAACTTATAGCCCCCCTTGA      |
| IL-1 $\beta$      | F'-CCATGGCACATTCTGTTCAA<br>R'-GCCCATCAGAGGCAAGGA              |
| IL-6              | F'-CCACGGCCTTCCCTACTTC<br>R'-TTGGGAGTGGTATCCTCTGTGA           |
| TNF $\alpha$      | F'-CACAAGATGCTGGGACAGTGA<br>R'-TCCTTG TGGTGGTGCATGA           |
| IL-12 p40         | F'-ACAGCACCAGCTTCTTCATCAG<br>R'-TCTTCAAAGGCTTCATCTGCAA        |
| IL-23 p19         | F'-CATAGCTGCCCGGGTCTTT<br>R'-GGCACTAAGGGCTCAGTCAGA            |
| TRIM21            | F'-TGACCATGGCTCCCTCATTT<br>R'-GTCGCAGAGGTCCAGCAA              |
